# Supplementary material for: Excess mortality during the COVID-19 pandemic: a geospatial and statistical analysis in Aden governorate, Yemen
Source: PubMed Central journal article supplement — BMJ Glob Health. 2021 Mar 23;6(3):e004564. doi: 10.1136/bmjgh-2020-004564 (PMC7992372; doi:10.1136/bmjgh-2020-004564), 2021-03-23
Supplement: bmjgh-2020-004564supp001.pdf [file bmjgh-2020-004564supp001.pdf]

## Excess mortality during the COVID-19 pandemic: a geospatial and statistical analysis in Aden governorate, Yemen

### SUPPLEMENTARY TABLES AND FIGURES

#### A. Population estimates

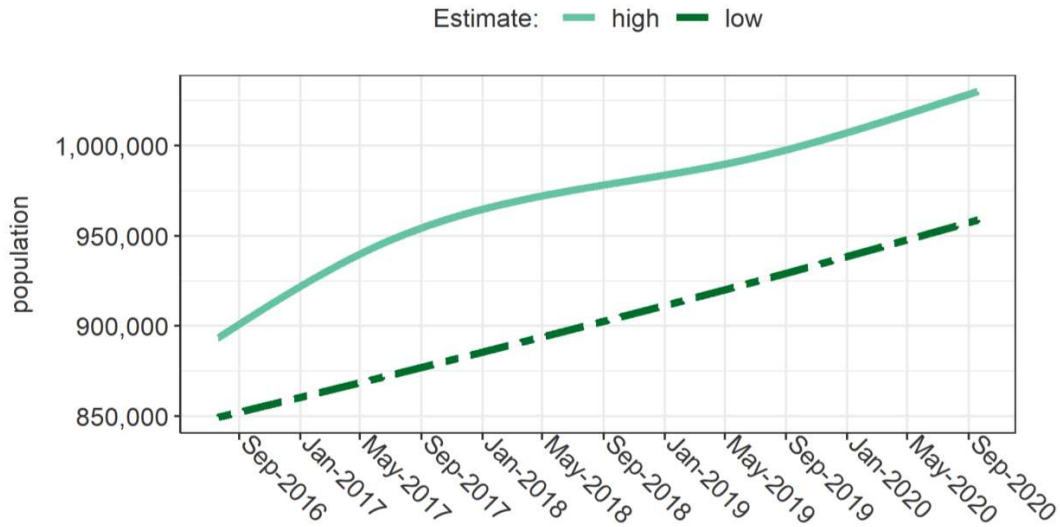

**Figure S1.** Estimated evolution of the population size of Aden governorate. The high-end estimate includes adjustment for displacement, and is adopted for the analysis. The low-end estimate is solely a weighted average of available base sources.

**Table S1.** Evaluation of the accuracy of existing population estimates. (note: \*none of the estimates have a confidence interval)

| Source                            | pop_worldpop_16-20 |        | pop_cso_16-20 |        |
|-----------------------------------|--------------------|--------|---------------|--------|
|                                   | WorldPop           |        | CSO Yemen     |        |
| Population ()                     | 4.524.256          |        | 4.443.555     |        |
| critierion                        | sub-score          | weight | sub-score     | weight |
| Choice of method                  | 0.60               | 0.25   | 0.80          | 0.25   |
| Precision*                        | 0.60               | 0.10   | 0.20          | 0.10   |
| Bias                              | 0.80               | 0.15   | 0.20          | 0.15   |
| Expertise/credibility             | 1.00               | 0.10   | 1.00          | 0.10   |
| Timing of data collection         | 1.00               | 0.15   | 0.00          | 0.15   |
| Population included in estimation | 1.00               | 0.15   | 1.00          | 0.15   |
| Plausibility                      | 0.60               | 0.10   | 0.60          | 0.10   |
| <b>Total Score</b>                | <b>0.79</b>        |        | <b>0.56</b>   |        |

## B. Model to impute new graves based on new surface area

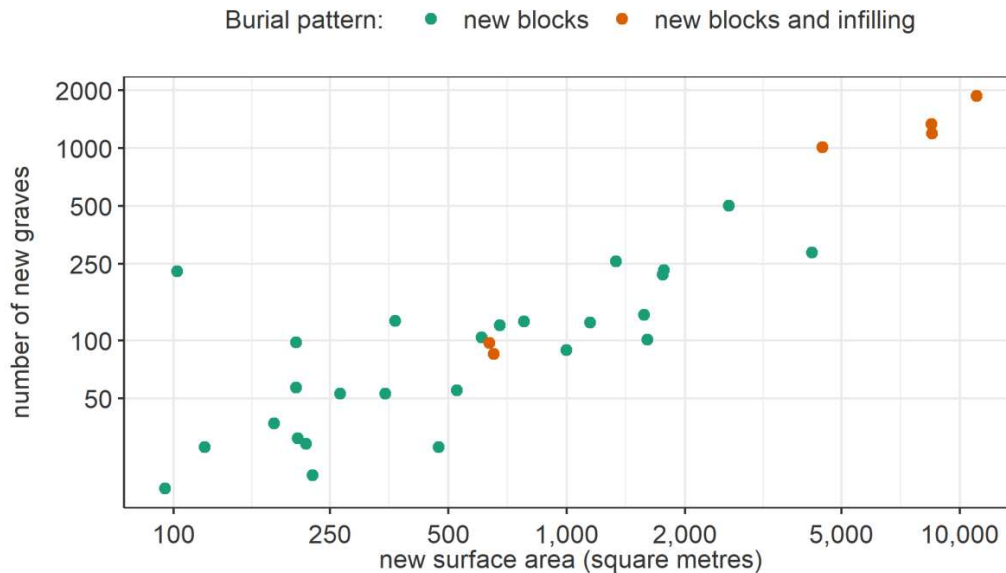

**Figure S2.** Correlation between the number of new graves and the new surface area expansion since the previous satellite image, by dominant burial pattern in the cemetery. Each plotted observation is an image (time point) within a given cemetery.

### Model formula:

$$\log(b|u) = \beta_0 + \beta_a a + \log B_{\text{start}} + \mathbf{Z}u,$$

where the response variable  $b = B_{t,u} - B_{t-1,u}$  i.e. the difference between burials  $B$  now and on the previous observation date in cemetery  $u$ , conditioned on  $u$  as the random effect;  $\beta_0$  is the intercept;  $\beta_a$  is the fixed effect coefficient of  $a = A_{t,u} - A_{t-1,u}$ , namely the difference between cemetery area  $A$  now and on the previous observation date,  $\log B_{\text{start}}$  is the offset and  $\mathbf{Z}$  is the random effect design matrix; a quasi-Poisson model parameterises the variance of  $b$  as  $\text{var}(b) = \theta\mu$ , where  $\mu$  is the expectation or mean of  $b$  and  $\theta$  an overdispersion multiplier, reflecting the skewed distribution of observed burial counts.

**Table S2.** Predictive model to impute new graves based on new surface area and baseline grave count. Only fixed effects are shown.

| Term                                     | Coefficient | SE                               | p-value |
|------------------------------------------|-------------|----------------------------------|---------|
| intercept                                | -5.025      | 1.465                            | < 0.001 |
| ln (new surface area in m <sup>2</sup> ) | 0.821       | 0.079                            | < 0.001 |
| AIC on training dataset:                 | 396.5       | Mean AIC across all LOOCV folds: | 385.1   |

SE: Standard error. AIC: Akaike Information Criterion. LOOCV: leave-one-out cross-validation.

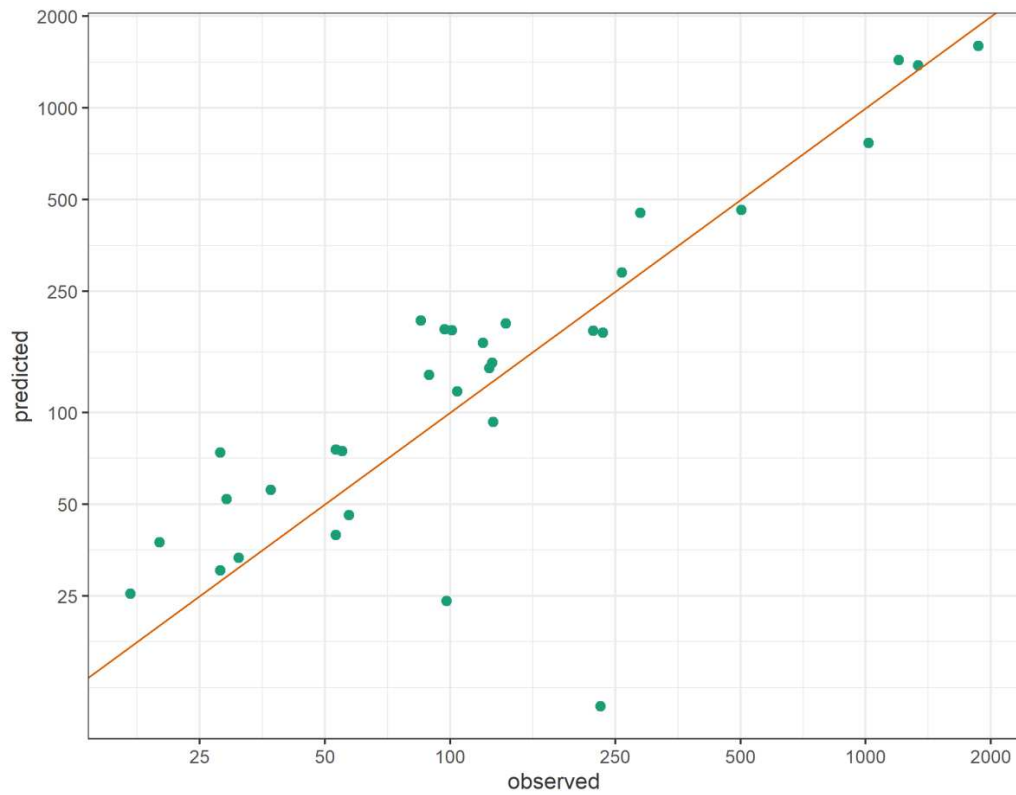

**Figure S3.** Predicted versus observed number of new graves after leave-one-out cross-validation. Each point indicates the observed and predicted values for the  $k^{\text{th}}$  fold (i.e. single observation) left out of the dataset, in turn. The red line indicates perfect agreement between observations and predictions.

### C. Estimates based on case-based analysis

**Table S3.** Estimates of baseline, epidemic period and excess burials by cemetery, based on smooth spline interpolation. Estimates of excess burials cover the period 1 April 2020 to 6 July 2020.

| Cemetery             | Duration of periods (days) |          | Burial rate per day |          |        | Cumulative number of deaths |        |        |
|----------------------|----------------------------|----------|---------------------|----------|--------|-----------------------------|--------|--------|
|                      | baseline                   | epidemic | baseline            | epidemic | excess | counterfactual              | actual | excess |
| Bir Ahmed            | 1350                       | 96       | 0.46                | 1.76     | 1.27   | 47                          | 169    | 122    |
| Al-Qalua'a           | 1034                       | 96       | 0.24                | 1.45     | 1.20   | 24                          | 139    | 115    |
| Aden Assougra        | 1350                       | 96       | 0.59                | 1.98     | 1.36   | 60                          | 190    | 130    |
| Mansoura             | 1350                       | 96       | 1.30                | 1.99     | 0.62   | 132                         | 191    | 59     |
| Abu Harbeh Aljadidah | 1350                       | 96       | 0.70                | 2.48     | 1.74   | 70                          | 238    | 167    |
| Kod Al-Othmani       | 483                        | 96       | 0.07                | 0.11     | 0.04   | 7                           | 10     | 4      |
| Al-Othmani           | 1350                       | 96       | 0.20                | 0.33     | 0.12   | 20                          | 31     | 11     |
| Radwan               | 1245                       | 96       | 3.44                | 12.42    | 8.81   | 347                         | 1192   | 846    |
| Salah El-Din         | 1350                       | 96       | 0.24                | 0.55     | 0.30   | 24                          | 53     | 29     |
| Faqam                | 1233                       | 96       | 0.10                | 0.27     | 0.17   | 10                          | 26     | 17     |
| Al-Qateea            | 1350                       | 96       | 1.18                | 0.73     | -0.51  | 119                         | 70     | -49    |

**Table S4.** Estimates of baseline, epidemic period and excess burials by cemetery, based on linear interpolation. Estimates of excess burials cover the period 1 April 2020 to 6 July 2020.

| Cemetery             | Duration of periods (days) |          | Burial rate per day |          |        | Cumulative number of deaths |        |        |
|----------------------|----------------------------|----------|---------------------|----------|--------|-----------------------------|--------|--------|
|                      | baseline                   | epidemic | baseline            | epidemic | excess | counterfactual              | actual | excess |
| Bir Ahmed            | 1350                       | 96       | 0.46                | 1.78     | 1.29   | 47                          | 171    | 124    |
| Al-Qalua'a           | 1034                       | 96       | 0.24                | 1.46     | 1.21   | 24                          | 140    | 116    |
| Aden Assougra        | 1350                       | 96       | 0.58                | 2.05     | 1.44   | 59                          | 197    | 138    |
| Mansoura             | 1350                       | 96       | 1.30                | 2.02     | 0.64   | 132                         | 194    | 62     |
| Abu Harbeh Aljadidah | 1350                       | 96       | 0.69                | 2.56     | 1.83   | 70                          | 246    | 176    |
| Kod Al-Othmani       | 483                        | 96       | 0.07                | 0.11     | 0.04   | 7                           | 10     | 4      |
| Al-Othmani           | 1350                       | 96       | 0.20                | 0.35     | 0.15   | 20                          | 34     | 14     |
| Radwan               | 1245                       | 96       | 3.47                | 13.28    | 9.64   | 349                         | 1275   | 926    |
| Salah El-Din         | 1350                       | 96       | 0.24                | 0.55     | 0.30   | 24                          | 53     | 29     |
| Faqam                | 1233                       | 96       | 0.09                | 0.28     | 0.18   | 10                          | 27     | 17     |
| Al-Qateea            | 1350                       | 96       | 1.17                | 0.76     | -0.48  | 119                         | 73     | -46    |

## D. Estimates based on GAMLSS model

### Model formula:

$b \sim D(\mu, \sigma)$ , where  $b$ , the response variable, is now  $B_{t,u}$ , i.e. total burials at a given time in a given cemetery, and is a function of  $D$ , a two-parameter distribution specified by

$$\log(\mu|u, t_{\text{base}}) = s_{\mu,u,t_{\text{base}}} t_{\text{base}} + s_{\mu,u,t_{\text{covid}}} t_{\text{covid}}$$

$$\log(\sigma|u, t_{\text{base}}) = s_{\sigma,u,t_{\text{base}}} t_{\text{base}} + s_{\sigma,u,t_{\text{covid}}} t_{\text{covid}}$$

Here,  $t_{\text{base}}$  is increasing time (days) from the start of the period, while  $t_{\text{covid}}$  is time since the assumed start of the pandemic in Aden; and  $s$  terms are polynomial smoothing functions that model the non-linear relationship between time and either the mean or the shape of the distribution of cumulative cemetery burials; these smoothing functions are themselves conditioned on the random effects of cemetery and time nested within cemetery.

**Table S5.** Fit statistics for an alternative GAMLSS model featuring the rate of insecurity events as an additional predictor. Coefficients are exponentiated to provide linear scale rate ratios.

| Term                                                                                   | Rate ratio                           | p-value                            |
|----------------------------------------------------------------------------------------|--------------------------------------|------------------------------------|
| Penalised B-spline smoothing terms for the mean (expectation) parameter:               |                                      |                                    |
| Baseline growth (day)                                                                  | 1.004                                | < 0.001                            |
| Added epidemic growth (day)                                                            | 0.996                                | < 0.001                            |
| Penalised B-spline smoothing terms for the shape (overdispersion) parameter:           |                                      |                                    |
| Baseline growth (day)                                                                  | 0.991                                | < 0.001                            |
| Added epidemic growth (day)                                                            | 1.028                                | < 0.001                            |
| Daily number of conflict events within the sub-district where the cemetery is located: |                                      |                                    |
| Each additional event                                                                  | 1.146                                | 0.012                              |
|                                                                                        | Akaike Information Criterion = 746.9 | Residual degrees of freedom = 47.0 |



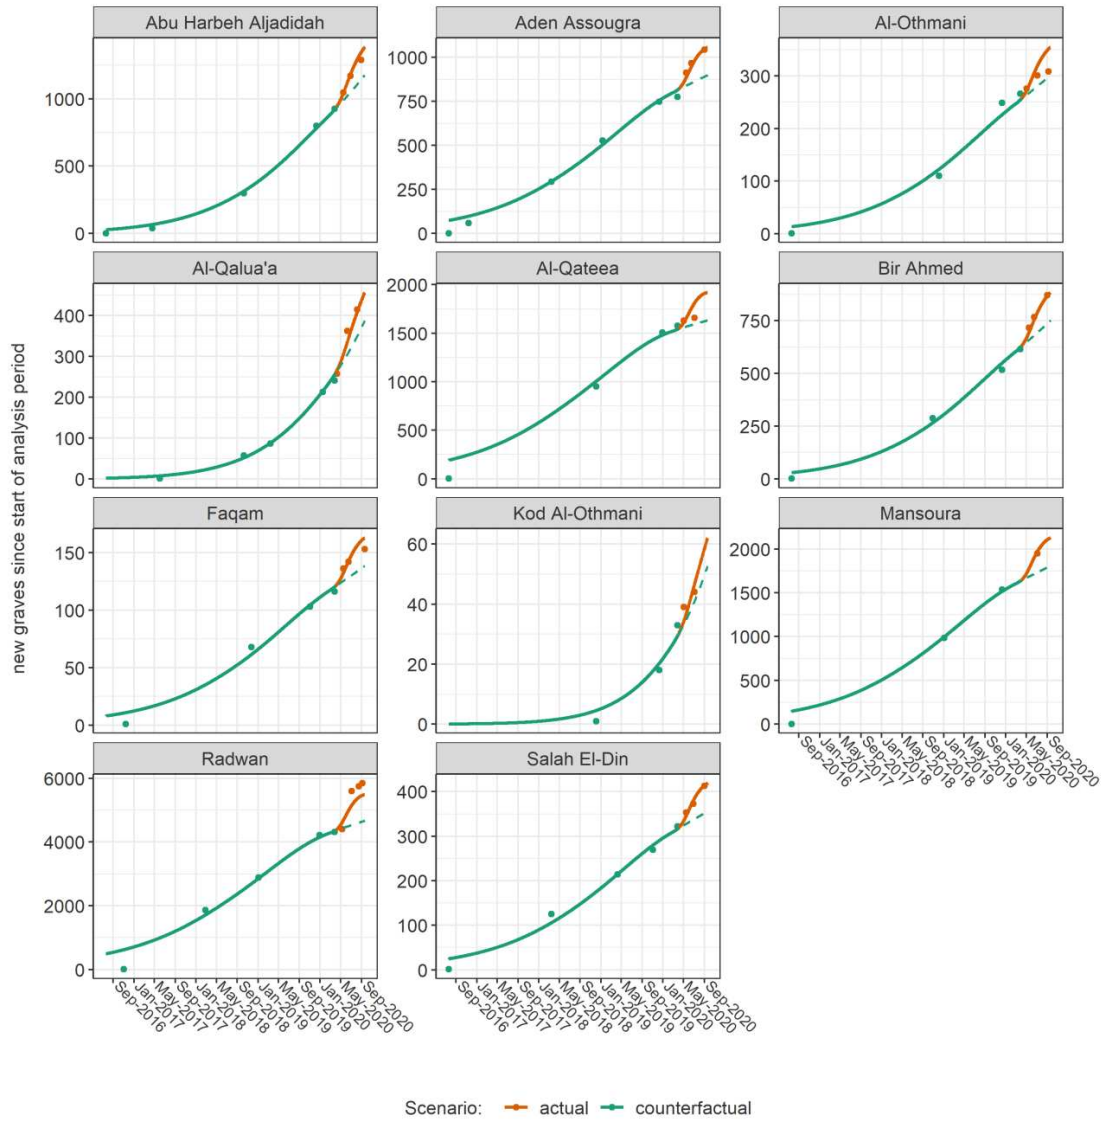

**Figure S4.** GAMLSS model predictions (lines) versus observations (dots), by cemetery. The dashed lines denote counterfactual predictions.

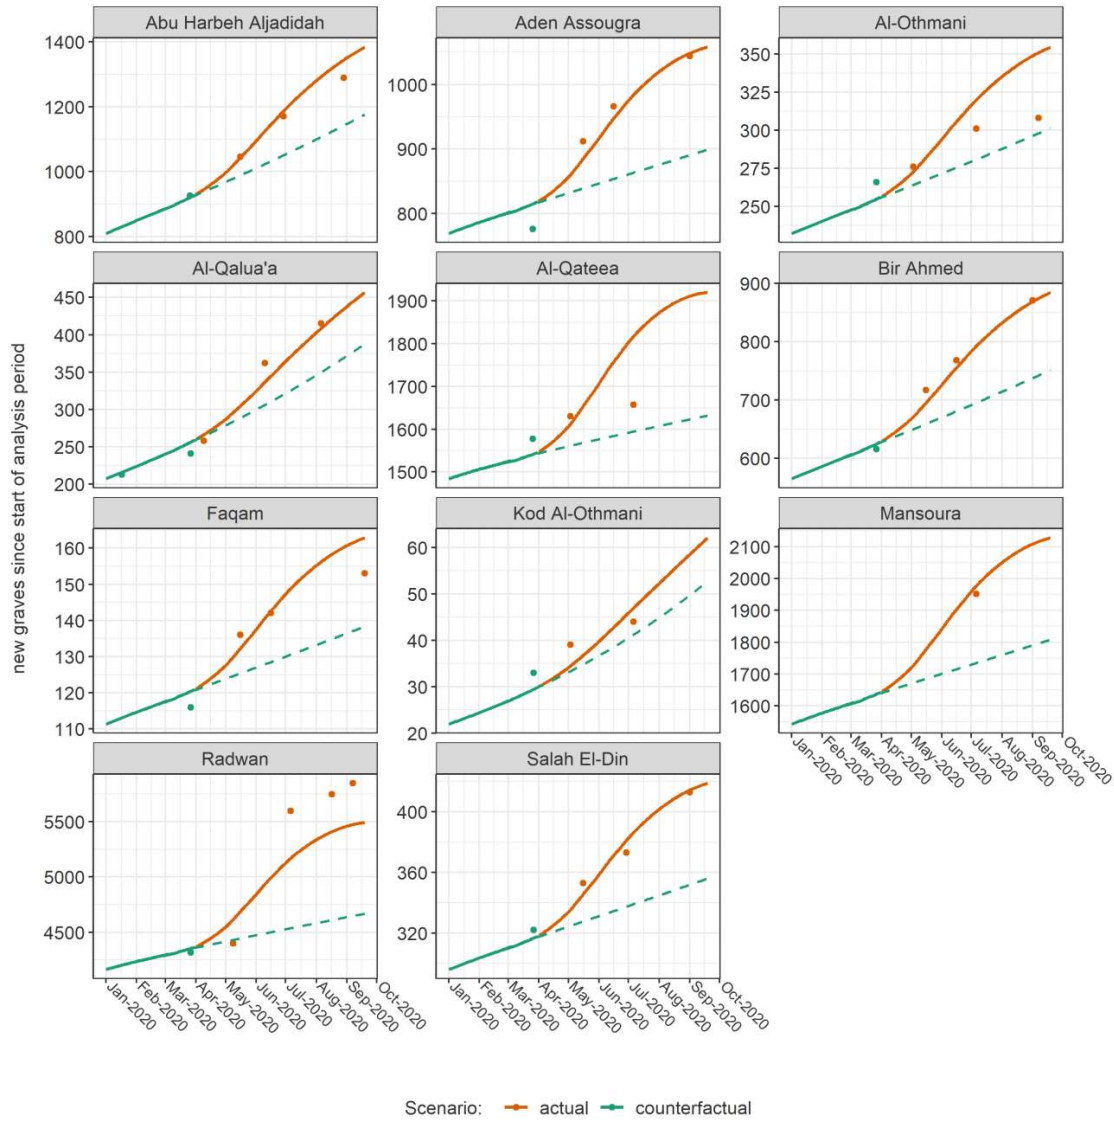

**Figure S5.** GAMLSS model predictions (lines) versus observations (dots), by cemetery, for the first 9 months of 2020. The dashed lines denote counterfactual predictions.

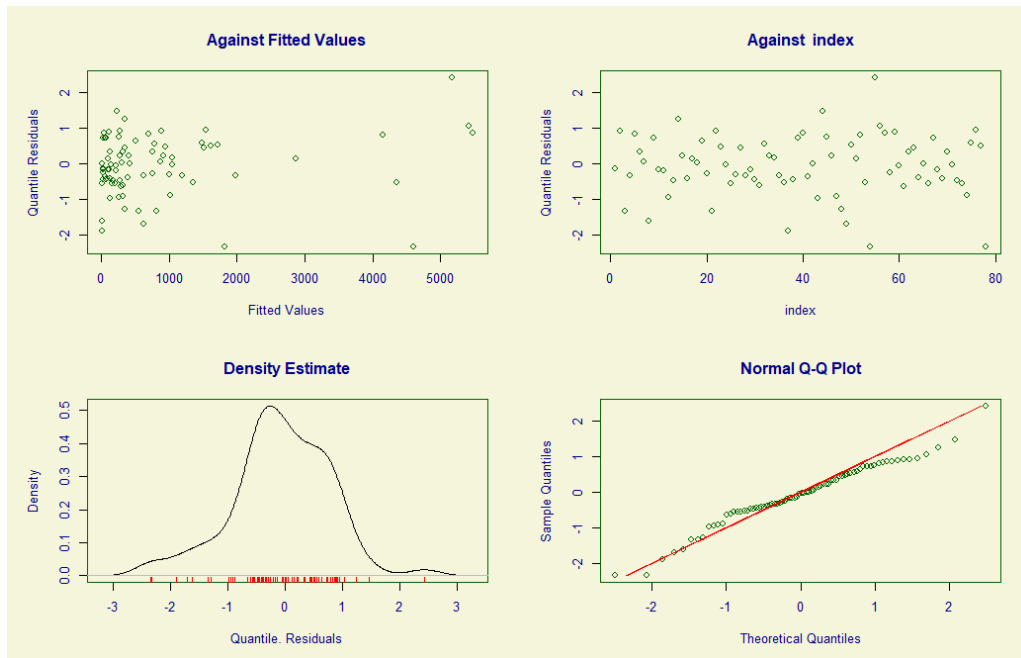

Figure S6. GAMLSS model diagnostic plots.

**Table S6.** Estimates of actual, counterfactual and excess burials by cemetery, based on the GAMLSS model. Estimates cover the period 1 April 2020 to 19 September 2020 (171 days).

| Cemetery                | Burial rate per day (95%CI) |                           |                        | Cumulative number of deaths (95%CI) |                        |                      |
|-------------------------|-----------------------------|---------------------------|------------------------|-------------------------------------|------------------------|----------------------|
|                         | counterfactual              | actual                    | excess                 | counterfactual                      | actual                 | excess               |
| Bir Ahmed               | 4.39<br>(4.04 to 4.80)      | 5.17<br>(4.25 to 6.19)    | 0.76<br>(0.10 to 1.54) | 751<br>(690 to 821)                 | 884<br>(726 to 1059)   | 130<br>(17 to 263)   |
| Al-Qalua'a              | 2.27<br>(2.04 to 2.51)      | 2.67<br>(2.12 to 3.23)    | 0.41<br>(0.07 to 0.74) | 388<br>(349 to 429)                 | 456<br>(362 to 552)    | 70<br>(12 to 127)    |
| Aden Assougra           | 5.26<br>(4.88 to 5.67)      | 6.19<br>(4.99 to 7.49)    | 0.89<br>(0.12 to 1.83) | 899<br>(835 to 969)                 | 1058<br>(854 to 1280)  | 153<br>(21 to 313)   |
| Mansoura                | 10.57<br>(9.87 to 11.23)    | 12.44<br>(10.04 to 15.04) | 1.65<br>(0.29 to 3.58) | 1807<br>(1688 to 1921)              | 2127<br>(1717 to 2571) | 282<br>(49 to 613)   |
| Abu Harbeh<br>Aljadidah | 6.87<br>(6.38 to 7.38)      | 8.09<br>(6.59 to 9.83)    | 1.19<br>(0.10 to 2.29) | 1175<br>(1091 to 1262)              | 1383<br>(1127 to 1681) | 204<br>(17 to 391)   |
| Kod Al-Othmani          | 0.31<br>(0.23 to 0.40)      | 0.36<br>(0.26 to 0.49)    | 0.05<br>(0.03 to 0.09) | 53<br>(39 to 69)                    | 62<br>(44 to 83)       | 9<br>(5 to 15)       |
| Al-Othmani              | 1.76<br>(1.55 to 1.98)      | 2.07<br>(1.63 to 2.53)    | 0.31<br>(0.09 to 0.54) | 301<br>(265 to 339)                 | 354<br>(279 to 433)    | 53<br>(16 to 93)     |
| Radwan                  | 27.31<br>(25.72 to 28.95)   | 32.15<br>(26.41 to 38.71) | 4.98<br>(1.01 to 9.66) | 4670<br>(4398 to 4951)              | 5498<br>(4516 to 6619) | 852<br>(172 to 1652) |
| Salah El-Din            | 2.08<br>(1.86 to 2.30)      | 2.45<br>(1.98 to 3.02)    | 0.34<br>(0.06 to 0.68) | 356<br>(318 to 393)                 | 419<br>(338 to 517)    | 58<br>(10 to 116)    |
| Faqam                   | 0.81<br>(0.67 to 0.96)      | 0.95<br>(0.73 to 1.18)    | 0.14<br>(0.06 to 0.26) | 138<br>(114 to 164)                 | 163<br>(125 to 202)    | 24<br>(10 to 45)     |
| Al-Qateea               | 9.53<br>(8.9 to 10.16)      | 11.22<br>(9.26 to 13.47)  | 1.73<br>(0.24 to 3.34) | 1630<br>(1522 to 1738)              | 1919<br>(1583 to 2304) | 295<br>(41 to 571)   |

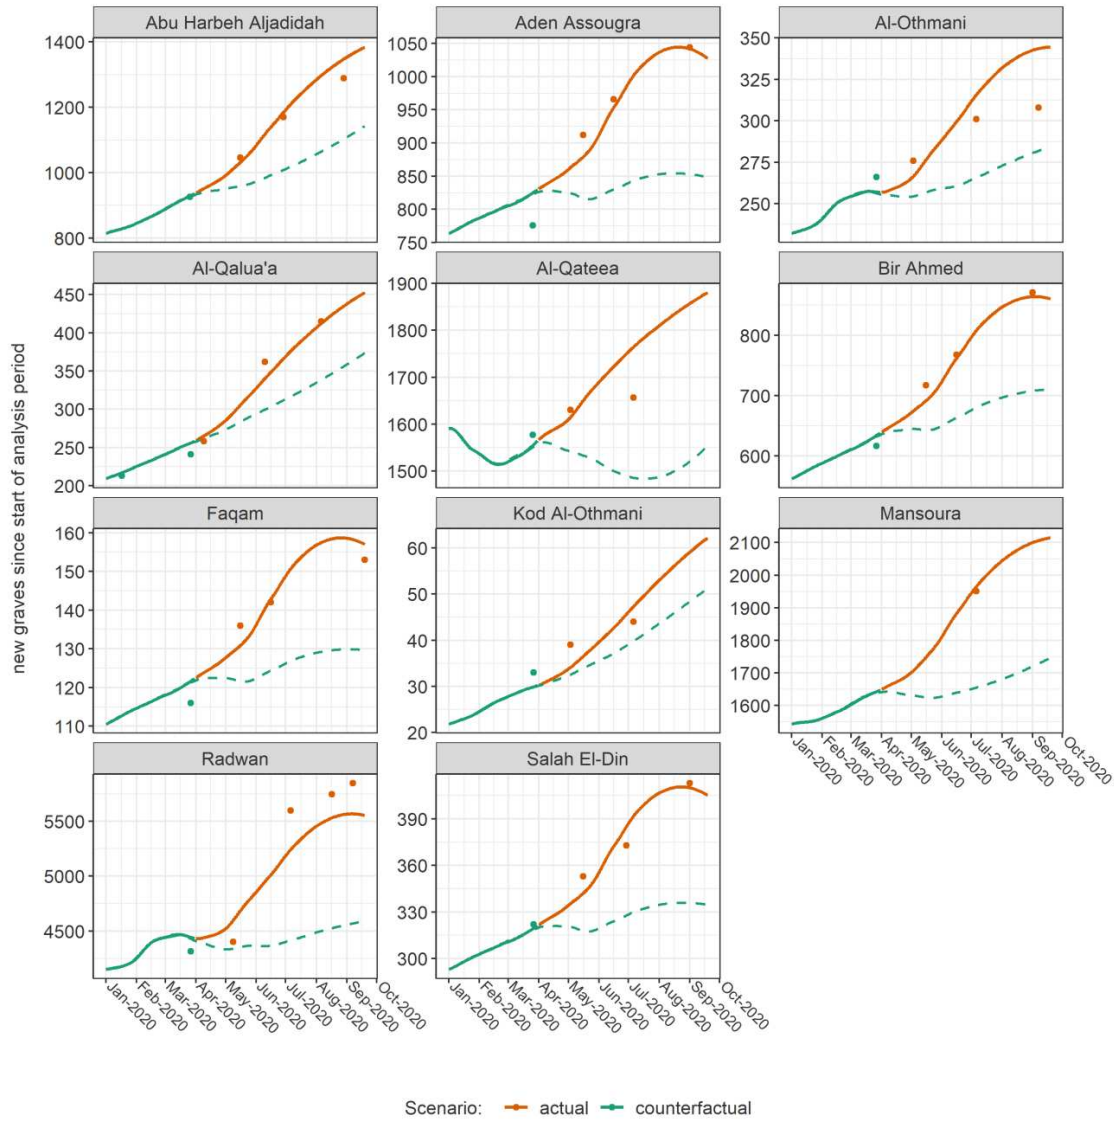

**Figure S7.** Predictions (lines) versus observations (dots), by cemetery, for the first 9 months of 2020, from an alternative GAMLSS model featuring the rate of insecurity events as an additional predictor. The dashed lines denote counterfactual predictions. Prediction lines have been moderately smoothed to avoid the jaggedness resulting from daily insecurity event fluctuations.

## E. Comparison of alternative sources

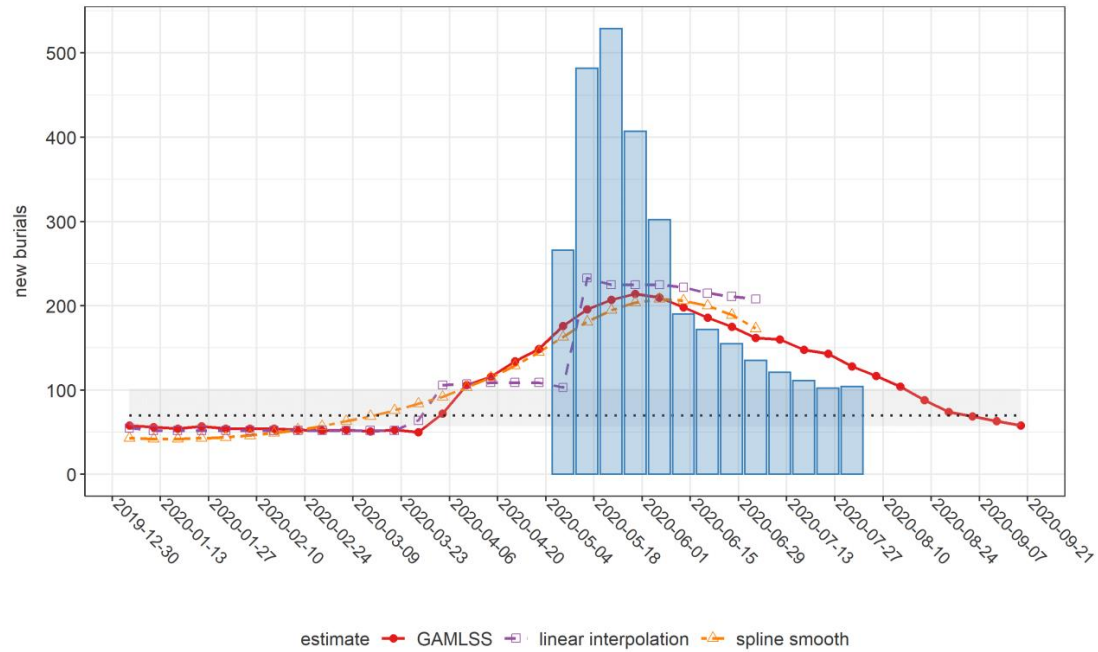

**Figure S8.** Comparison of weekly estimates of new burials across Aden governorate, by analysis method, and corresponding records from the Civil Registry office (blue columns), during 2020. The horizontal dotted line and shaded area indicate the median, minimum and maximum weekly burials based on the 2017-2019 Civil Registry time series.
